# Supplementary material
Source: PubMed Central journal article supplement (PMC3382011)

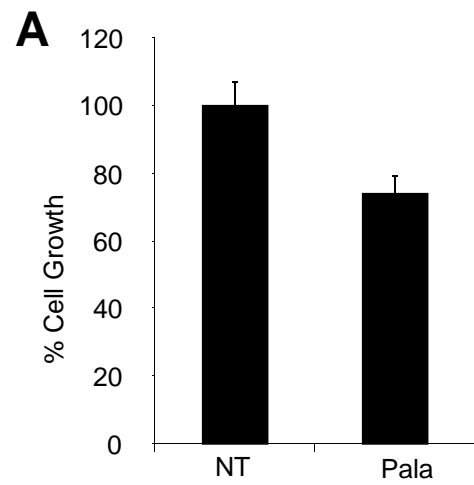

**B**

|      | G1  | S   | G2/M |
|------|-----|-----|------|
| NT   | 46% | 14% | 27%  |
| 24 h | 61% | 12% | 13%  |
| 48 h | 42% | 24% | 14%  |
| 72 h | 44% | 23% | 21%  |

Supplement: NIHMS357956-supplement-01.pdf [file NIHMS357956-supplement-01.pdf]
